# Supplementary material
Source: PubMed Central journal article supplement (PMC4675668)
Supplement: NIHMS736899-supplement-supplemental.pdf [file NIHMS736899-supplement-supplemental.pdf]

## Supporting Information

### **Activatable and Cell-Penetrable Multiplex FRET Nanosensor for Profiling MT1-MMP Activity in Single Cancer Cells**

Eddie Y. Chung<sup>1</sup>, Christopher J. Ochs<sup>2</sup>, Yi Wang<sup>3</sup>, Lei Lei<sup>1,3</sup>, Qin Qin<sup>1</sup>, Andrew M. Smith<sup>3</sup>, Alex Y. Strongin<sup>4</sup>, Roger Kamm<sup>2</sup>, Ying-Xin Qi<sup>5,\*</sup>, Shaoying Lu<sup>1,3,\*</sup>,  
Yingxiao Wang<sup>1,3,\*</sup>

<sup>1</sup>Department of Bioengineering & Institute of Engineering in Medicine, University of California, San Diego, California, USA; <sup>2</sup>Singapore-MIT Alliance for Research and Technology, BioSystems and Micromechanics, Singapore; <sup>3</sup>Department of Bioengineering, University of Illinois, Urbana-Champaign, Illinois, USA; <sup>4</sup>Sanford Burnham Medical Research Institute, La Jolla, California, USA; <sup>5</sup>Institute of Mechanobiology and Medical Engineering, Shanghai Jiao Tong University, Shanghai, China.

\*Correspondence: [yiw015@ucsd.edu](mailto:yiw015@ucsd.edu); [kalu@ucsd.edu](mailto:kalu@ucsd.edu); [qiyx@sjtu.edu.cn](mailto:qiyx@sjtu.edu.cn)

## Supplementary Figure Legends

**Figure S1.** The effect of binding competitor imidazole on the spectra of the FRET nanosensors. The spectra of the nanosensors with (blue line) or without (red line) addition of imidazole (100 mM). The spectra were obtained after incubation for 3 min.

**Figure S2.** Visualize MT1-MMP activity in breast cancer cells with GM wash-out assay. The left panel show the DIC images of the cells. The middle and right panels show the QD/FRET ratio images of the cells from  $t = 0$  min (middle) to  $t = 5$  min (right) after GM washout. **(a)** The cancer cells were incubated with nanosensors for 1 hour. **(b)** The cancer cells were incubated with nanosensors for  $>6$  hours.

**Figure S3.** The effect of the RGD motif. **(a)** Normalized QD Intensity is compared in cells with the QD nanosensor (with the RGD motif,  $n = 22$ ) and those with QD only (no RGD motif,  $n = 19$ ). The QD intensity of the QD only group was close to zeros. \* indicates statistically significant difference,  $p < 0.001$ . Error bar: SEM. **(b)** shows the donor fluorescence intensity and DIC images of the cells. **Top panels:** The MT1-MMP biosensor with the RGD motif showed clear donor fluorescence intensity in all cells. **Lower panels:** the MT1-MMP biosensors without the RGD motif showed no donor fluorescence intensity at the location of cells.

**Figure S4.** The QD/FRET ratio of the nanosensor with the varying ratios of peptide-Cy3:QD during the assembly. There is no significant difference in QD/FRET ratio when the ratio of peptide-Cy3:QD is at 31:1, 62:1, or 93:1.

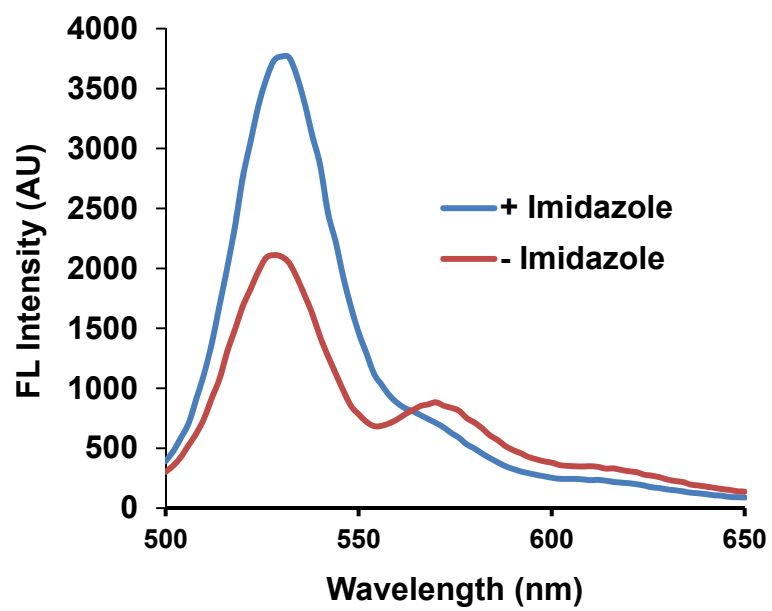

Figure S1

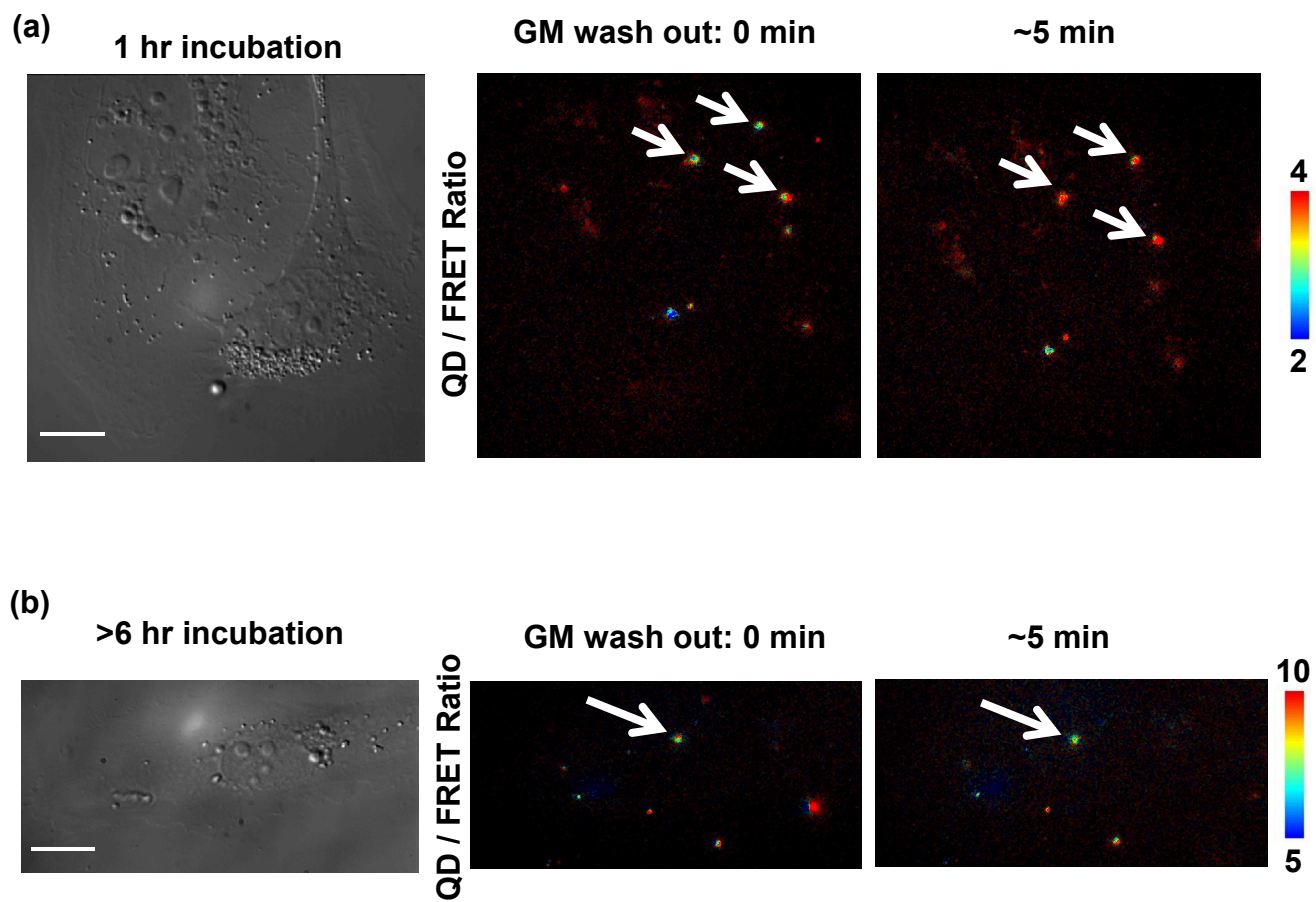

Figure S2

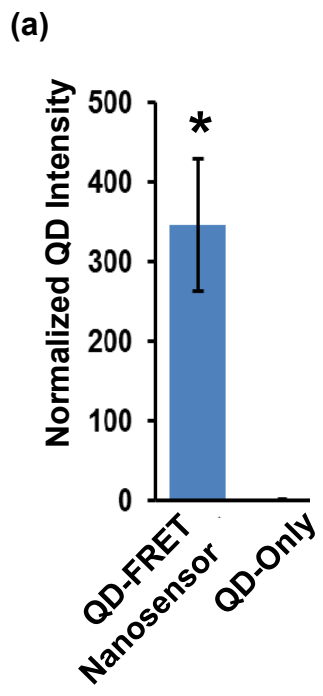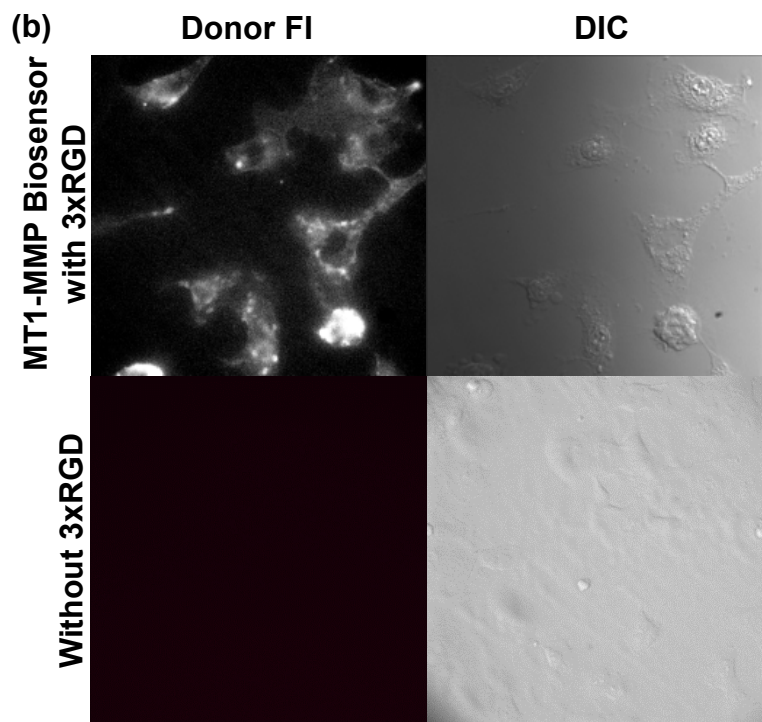

Figure S3

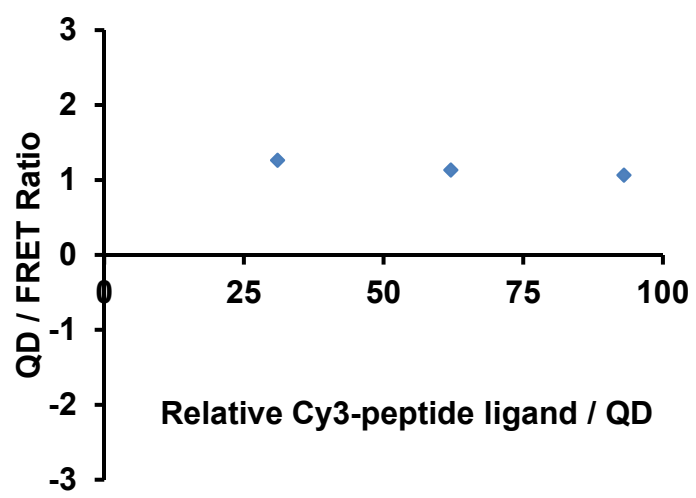

Figure S4
